# Supplementary material
Source: PubMed Central journal article supplement (PMC7174882)
Supplement: BPH-177-2393-s001.pdf [file BPH-177-2393-s001.pdf]

1 **Supporting Information**

2  
3 **Luteolin prevents irinotecan-induced intestinal mucositis in mice through**  
4 **antioxidant and anti-inflammatory properties.**

5  
6 Thaise Boeing<sup>1</sup>; Priscila de Souza<sup>1</sup>; Silvia Speca<sup>2</sup>; Lincon Bordignon Somensi<sup>1</sup>; Luisa  
7 Nathália Bolda Mariano<sup>1</sup>; Benhur Judah Cury<sup>1</sup>; Mariana Ferreira dos Anjos<sup>1</sup>; Nara Lins  
8 Meira Quintão<sup>1</sup>; Laurent Dubuqoy<sup>2</sup>; Pierre Desreumax<sup>2</sup>; Luisa Mota da Silva<sup>1</sup>; Sérgio  
9 Faloni de Andrade<sup>1</sup>.

10  
11 <sup>1</sup>Programa de Pós-Graduação em Ciências Farmacêuticas (PPGCF), Núcleo de  
12 Investigações Químico-Farmacêuticas (NIQFAR), Universidade do Vale do Itajaí  
13 (UNIVALI), Itajaí-SC, Brazil;

14 <sup>2</sup>Université Lille 2, CHRU de Lille, Inserm, Lille Inflammation Research International  
15 Center (LIRIC), U995, Lille, France.

16  
17 Correspondence: Thaise Boeing, Programa de Pós-Graduação em Ciências  
18 Farmacêuticas (PPGCF), Núcleo de Investigações Químico-Farmacêuticas (NIQFAR),  
19 Universidade do Vale do Itajaí (UNIVALI), Rua Uruguai, 458, Centro, 88302-202 Itajaí,  
20 SC, Brazil, tize.thaise@gmail.com

21  
22 **Keywords:** Flavonoid, chemotherapy, inflammation, oxidative stress, tight junctions.

## 26 **Supporting Method**

### 27 **Method S1. Evaluation of digestive motility rate**

#### 28 *Diarrheal state*

29           The Swiss mice were divided into three groups, including naive, vehicle (Veh:  
30 water plus 1% Tween, 10 ml/kg) and luteolin (30 mg/kg, p.o), of 6 animals each, that  
31 were orally treated by gavage for 14 days, except for naive which did not receive any  
32 treatment. From the 7th to 10th day, irinotecan was intraperitoneally given at the dose of  
33 75 mg/kg per day to the Veh and Lut groups. On the 15<sup>th</sup> day of experiment, the animals  
34 received 0.5 ml of the semisolid marker solution (0.05% phenol red plus 1.5%  
35 carboxymethyl cellulose). After 20 min, the mice were euthanized and small intestine was  
36 removed. The distance traveled by phenol red (A) and the total length of the small  
37 intestine (B) were measured to further calculate the digestive motility rate (DM %)   
38 through equation  $DM = A \div B \times 100$  (Boeing et al., 2018).

39

#### 40 *Resting state*

41           The Swiss mice were divided into three groups of 6 animals each, including  
42 vehicle (Veh: water plus 1% Tween, 10 ml/kg, p.o.), atropine (Atp: 3 mg/kg, s.c.), and  
43 luteolin (30 mg/kg, p.o.). Thirty minutes after Atp or one hour after Veh or luteolin  
44 treatments, the animals received 0.5 ml of the semisolid marker solution (0.05% phenol  
45 red plus 1.5% carboxymethyl cellulose). After 20 min, the mice were euthanized, and  
46 digestive motility rate was evaluated as described above.

47 **Method S2. Effect of Luteolin treatment during 7 days on irinotecan-induced**  
48 **intestinal mucositis.**

49 The Swiss mice were divided into three groups, including naive, vehicle (Veh:  
50 water plus 1% Tween, 10 ml/kg) and luteolin (30 mg/kg), of 10 animals each, that were  
51 orally treated by gavage for 7 days, except for naive which did not receive any treatment.

52 From the 1<sup>st</sup> to the 4<sup>th</sup> day, irinotecan was administered intraperitoneally at a dose  
53 of 75 mg/kg per day to the Veh and Lut groups to induce intestinal mucositis (Ikuno et  
54 al., 1995). The body weight was daily measured, and diarrhea score and weight/length  
55 ratio of intestine were measured in the 7<sup>th</sup> day of experiment as previously described.

56

57 **Method S3. Mechanical withdrawal threshold evaluation**

58 The Swiss mice were divided into three groups, including naive, vehicle (Veh:  
59 water plus 1% Tween, 10 ml/kg) and luteolin (30 mg/kg), of 10 animals each, that were  
60 orally treated by gavage for 14 days, except for naive which did not receive any treatment.

61 From the 7<sup>th</sup> to 10<sup>th</sup> day, irinotecan was intraperitoneally given at a dose of 75  
62 mg/kg per day to the Veh and Lut groups and the mechanical hypersensitivity was  
63 measured.

64 For the evaluation of mechanical hypersensitivity, mice were individually placed  
65 in Plexiglas boxes on elevated wire mesh platforms to allow access to the ventral surface  
66 of the right hind paw. The mice were previously habituated in the compartments for 30  
67 min daily for 2 weeks before the beginning of the experiment. The withdrawal response  
68 frequency was measured following 10 applications (duration of 1 s each) of von Frey  
69 filaments (Stoelting, Chicago, IL, USA). Stimuli were delivered from below, to the  
70 plantar surface of the right hind paw. The 0.6 g filament produces a mean withdrawal

71 frequency of about 15% in naive mice, which is considered to be an adequate value for  
72 the measurement of mechanical hypersensitivity (Quintão et al., 2019).

73 Mechanical threshold was defined as the minimum weight of the filament that  
74 induced at least 5 responses (fast paw withdrawal, flinching, or licking/biting of the  
75 stimulated paw) out of 10 stimulations (Cobos et al., 2012). The comparison between  
76 groups was done by the line graph and also by the area under the curve of the respective  
77 group.

78

#### 79 **Method S4. Biochemical analyses**

80 Blood samples collected at the end of the experiment were separated by  
81 centrifugation at 3000g for 15 min at 4 °C. The plasma levels of creatinine, urea, aspartate  
82 transaminase (AST) and alanine transaminase (ALT) were assessed using colorimetric  
83 test (Bioclin, Belo Horizonte, MG, Brazil), following the manufacturer's instructions.

84

#### 85 **Method S5. Evaluation of antitumor activity**

86 C57BL/6 female mice were exclusively used to perform this study, once this  
87 mouse strain allows tumor development by [B16F10 cells \(RRID:CVCL\\_0159\)](#) injection.  
88 Briefly, B16F10 (melanoma cells) were injected subcutaneously in the flank of mice at a  
89 concentration of  $2 \times 10^5$  following the protocol previously described (Arifa *et al.*, 2016).  
90 After 21 days, mice that developed the tumor were randomly divided into groups (6-10)  
91 which were treated with vehicle (Veh: water plus 1% Tween, 10 ml/kg, p.o.), irinotecan  
92 (Iri: 75 mg/kg, i.p.) luteolin (Lut: 30 mg/kg, p.o.) or Lut plus Iri for 7 days. The tumor  
93 area was measured daily using a pachymeter and after euthanasia on the 8<sup>th</sup> day, weight  
94 and volume were also evaluated.

95

## 96 **Method S6. Cell viability**

97 Murine intestinal epithelial cells ([IEC-6, RRID:CVCL\\_0343](#)) were cultured in  
98 Dulbecco's modified Eagle's medium (DMEM) (Vitrocell Embriolife, Brazil),  
99 supplemented with 10% foetal bovine serum (Vitrocell Embriolife, Brazil) and 0.1%  
100 penicillin-streptomycin (Gibco) at 37 °C in 5% CO<sub>2</sub> atmosphere until reaching 80% of  
101 confluence. Thereafter, cell viability was evaluated through MTT assay.

102 Briefly,  $5 \times 10^4$  cells / well were seeded in 96-well plate and after 24 hours the  
103 following treatments were incubated: Basal (DMEM plus DMSO 0.1%), DMSO (10%),  
104 irinotecan (Iri 3-30  $\mu$ M), luteolin (lut 3-30  $\mu$ M in DMEM plus DMSO 0.1%), or lut 30  
105  $\mu$ M plus Iri 30  $\mu$ M. After 21h, 10  $\mu$ L of 3-(4,5-dimethylthiazol-2-yl)-2,5-  
106 diphenyltetrazolium bromide (MTT, 5 mg/ml) were added in each well for 3 hours, then  
107 250  $\mu$ l of the supernatant was removed and replaced for 150  $\mu$ l of DMSO. Each solution  
108 was homogenized, and the absorbance was measured at 570 nm. The percentage of cell  
109 viability was determined considering the means of the basal group as 100%.

110

## 111 **Method S7. DPPH· radical scavenging assay**

112 The antioxidant effect of luteolin on DPPH· radical was estimated according to  
113 the procedure described by Brand-Williams *et al.* with a few modifications. An aliquot  
114 (750  $\mu$ l) of different concentrations of luteolin (0.1 – 10  $\mu$ g/ml) was mixed to 250  $\mu$ l of  
115 DPPH·  $6.0 \times 10^{-5}$  M in methanol solution. The decrease in the absorbance was determined  
116 at 515 nm when the reaction reached a plateau. The absorbance of the DPPH· radical  
117 without any antioxidant was measured (Veh), and ascorbic acid (AA: 50  $\mu$ g/ml) was used  
118 as a positive control. The individual values of absorbance were interpolated to a standard  
119 curve of DPPH (0–60  $\mu$ M) and the results were expressed as  $\mu$ M of DPPH (Brand-  
120 Williams *et al.*, 1995).

121 **Supporting Results**

122 **Figure S1**

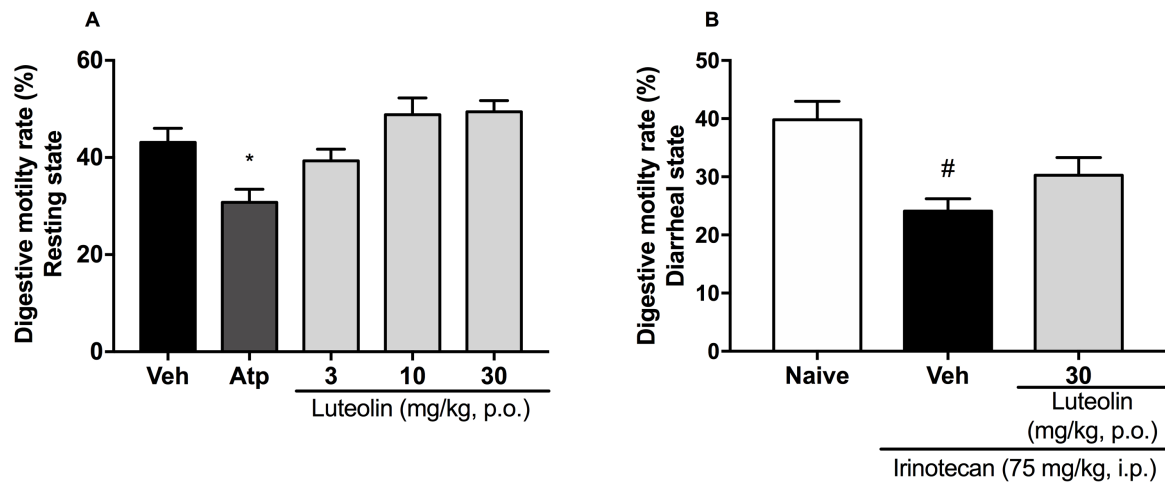

123

124 **Figure S1. Effect of luteolin on digestive motility rate (%).** (A) Resting state. The  
125 results are expressed as mean  $\pm$  SEM ( $n = 6$ ). Statistical analysis was performed using  
126 one-way ANOVA followed by Bonferroni's post hoc test. \*  $p < 0.05$  compared with the  
127 vehicle group (Veh: water plus 1% tween. 10 ml/kg. p.o.); Atp: Atropine (3 mg/kg. s.c.).  
128 (B) Diarrheal state. Female mice were treated for 14 days by oral route with vehicle (Veh:  
129 water plus Tween 1%, 10 ml/kg) or luteolin (30 mg/kg). Irinotecan was given by  
130 intraperitoneal route (75 mg/kg, from 7<sup>th</sup> to 10<sup>th</sup> day) for Veh and Luteolin-treated groups.  
131 Digestive motility rate was evaluated on the 15<sup>th</sup> day of experiment. The results are  
132 expressed as mean  $\pm$  SEM ( $n = 6$ ). Statistical analysis was performed using one-way  
133 ANOVA followed by Bonferroni's post hoc test. #  $p < 0.05$  compared to the naive.

134

135

136

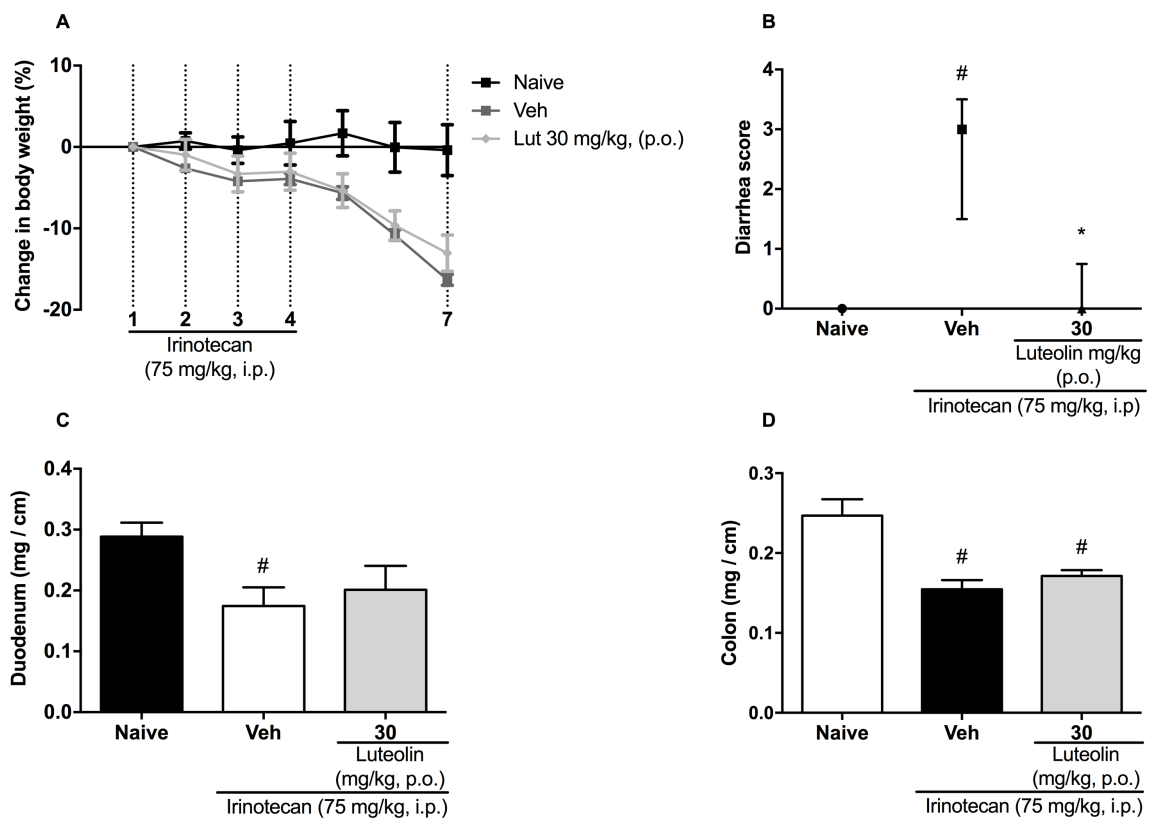

138

139 **Figure S2. Effect of luteolin treatment by oral route on irinotecan-induced intestinal**  
 140 **mucositis.** Female mice were treated for 7 days by oral route with vehicle (Veh: water  
 141 plus Tween 1%, 10 ml/kg) or luteolin (Lut 30 mg/kg). Irinotecan was given by  
 142 intraperitoneal route (75 mg/kg, from 1<sup>st</sup> to the 4<sup>th</sup> day) for Veh and Luteolin-treated  
 143 groups. (A) The weight of the animals was measured daily. Weight loss was significantly  
 144 different from the 5<sup>th</sup> to 7<sup>th</sup> day of experiment in both treated groups compared to naive.  
 145 The results are expressed as mean  $\pm$  SEM ( $n = 10$ ). Statistical analysis was performed  
 146 using two-way ANOVA followed by Bonferroni's post hoc test. (B) The diarrhea score  
 147 was evaluated on the 7<sup>th</sup> day of treatment. The results are expressed as median with  
 148 interquartile range ( $n = 10$ ). Statistical analysis was performed by Kruskal-Wallis  
 149 followed by Dunn's test. \* $p < 0.05$  compared to vehicle. #  $p < 0.05$  compared to naive

150 group. (C and D) Weight/length ratio of duodenum and colon. The results are expressed  
151 as mean  $\pm$  SEM ( $n = 10$ ). Statistical analysis was performed using one-way ANOVA  
152 followed by Bonferroni's post hoc test. #  $p < 0.05$  compared to the naive group.

153

154

155

156

157

158



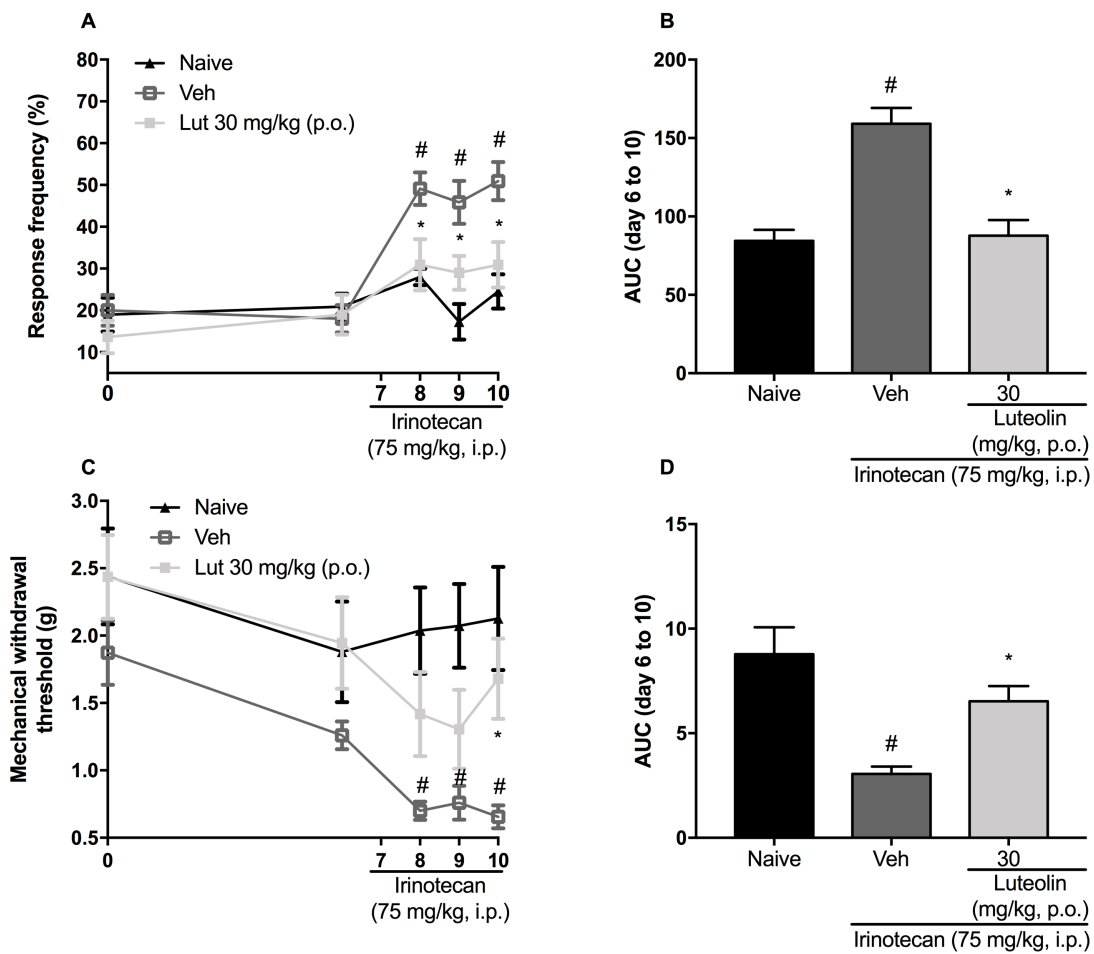

160

161 **Figure S3. Effect of luteolin by oral route in the mechanical hypersensitivity of**  
 162 **irinotecan-exposed mice.** Female mice were treated by oral route with vehicle (Veh:  
 163 water plus Tween 1%, 10 ml/kg) or luteolin (Lut 30 mg/kg). From the 7<sup>th</sup> to 10<sup>th</sup> day  
 164 irinotecan was intraperitoneally given at a dose of 75 mg/kg per day to the Veh and Lut  
 165 groups and the mechanical hypersensitivity was measured by von Frey filament. (A)  
 166 Response frequency (%) and (C) mechanical withdrawal threshold (g) are presented  
 167 followed their respective A.U.C. (B and D). The results are expressed as mean ± SEM (*n*  
 168 = 10). Statistical analysis was performed using two-way ANOVA followed by  
 169 Bonferroni's post hoc test. \* *p* < 0.05 compared to vehicle. # *p* < 0.05 compared to naive  
 170 group.

171 **Figure S4**

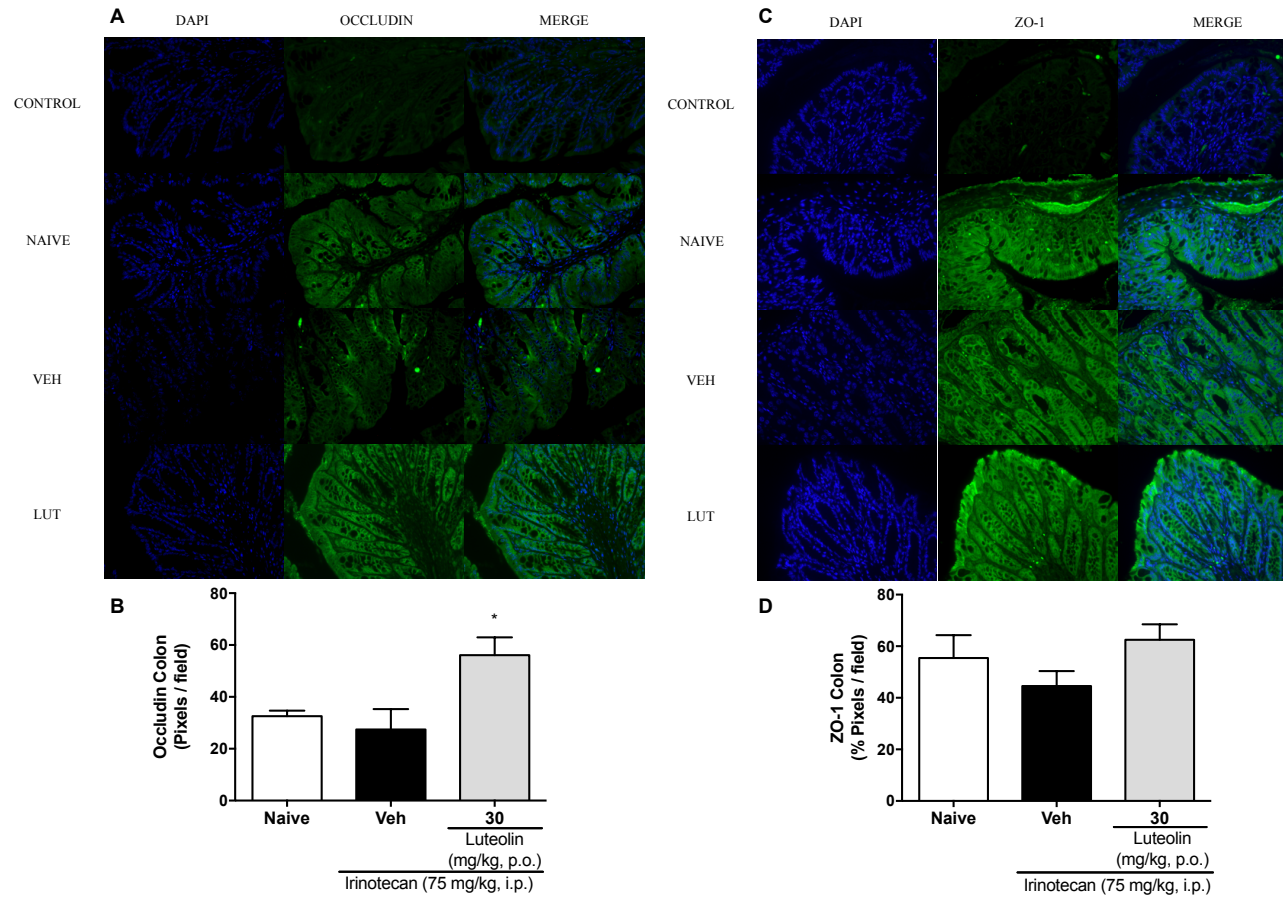

183 **Figure S4. Effect of luteolin on tight junctions (TJs) expression in the colon of irinotecan-exposed mice.** Immunofluorescence staining of the  
 184 colon for Occludin (A) and ZO-1 (C) protein was performed (green). Nuclei are stained with DAPI (blue). Non-relevant IgG was used as control.

185 Magnification  $\times 20$ . (B, D) Fluorescence was quantified with ImageJ® program. Six fields per animal were analyzed ( $n = 5$ ). The results are  
186 expressed as mean  $\pm$  SEM. Statistical analysis was performed using one-way ANOVA followed by Bonferroni's post hoc test. \*  $p < 0.05$  compared  
187 to vehicle group.

188

189

190

191

192

193

194

195

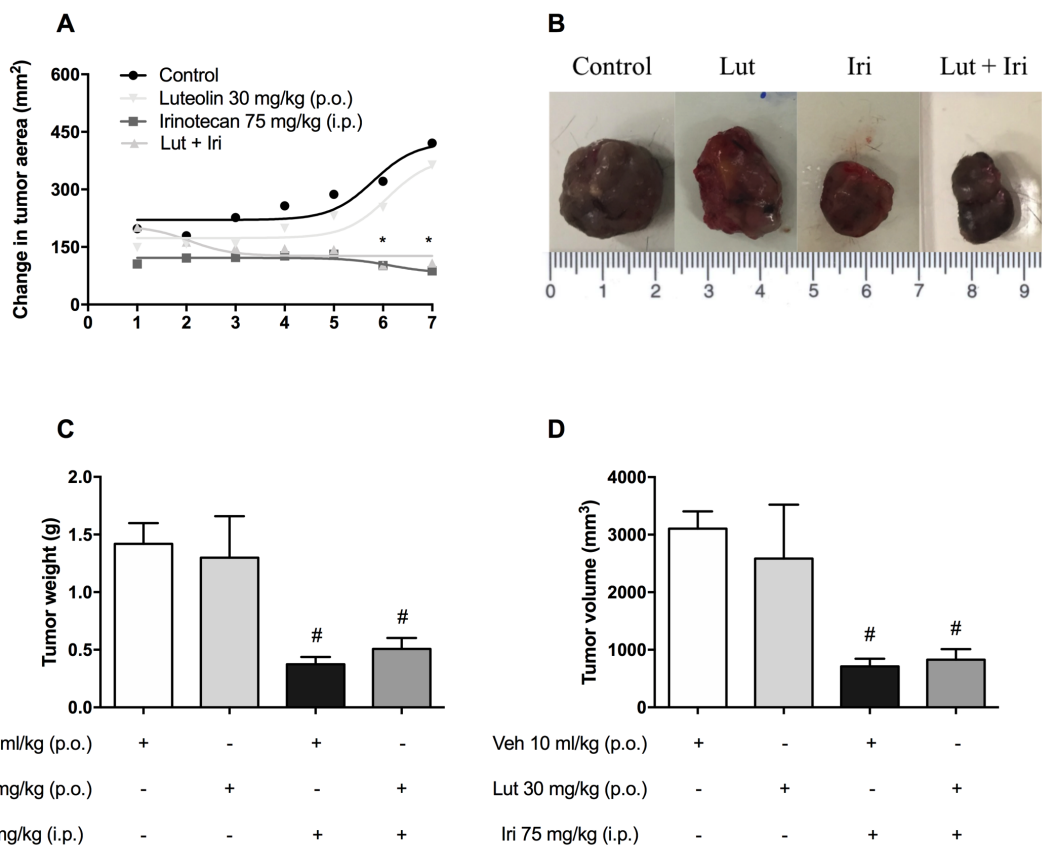

197

198 **Figure S5. Luteolin does not interfere with the antitumor activity of Irinotecan.**

199 Melanoma cells (B16F10) were injected in the flank of C57BL/6 mice and after the tumor  
 200 development, the animals were treated for 7 days with control (water plus Tween 1%, 10  
 201 ml/kg, p.o.), luteolin (Lut 30mg/kg, p.o.), irinotecan (Iri 75 mg/kg, i.p.) or luteolin plus  
 202 irinotecan (Lut + Iri). Tumor area (A) was measured daily. Tumor weight (C) and tumor  
 203 volume (D) were measured after euthanasia of mice. The results are expressed as mean  $\pm$   
 204 SEM ( $n = 10$ ). Statistical analysis was performed using one-way ANOVA followed by  
 205 Bonferroni's post hoc test. (A) \*  $p < 0.05$  compared Irinotecan and Lut + Iri to control  
 206 group. (C and D) #  $p < 0.05$  compared to vehicle group without irinotecan.

207

208

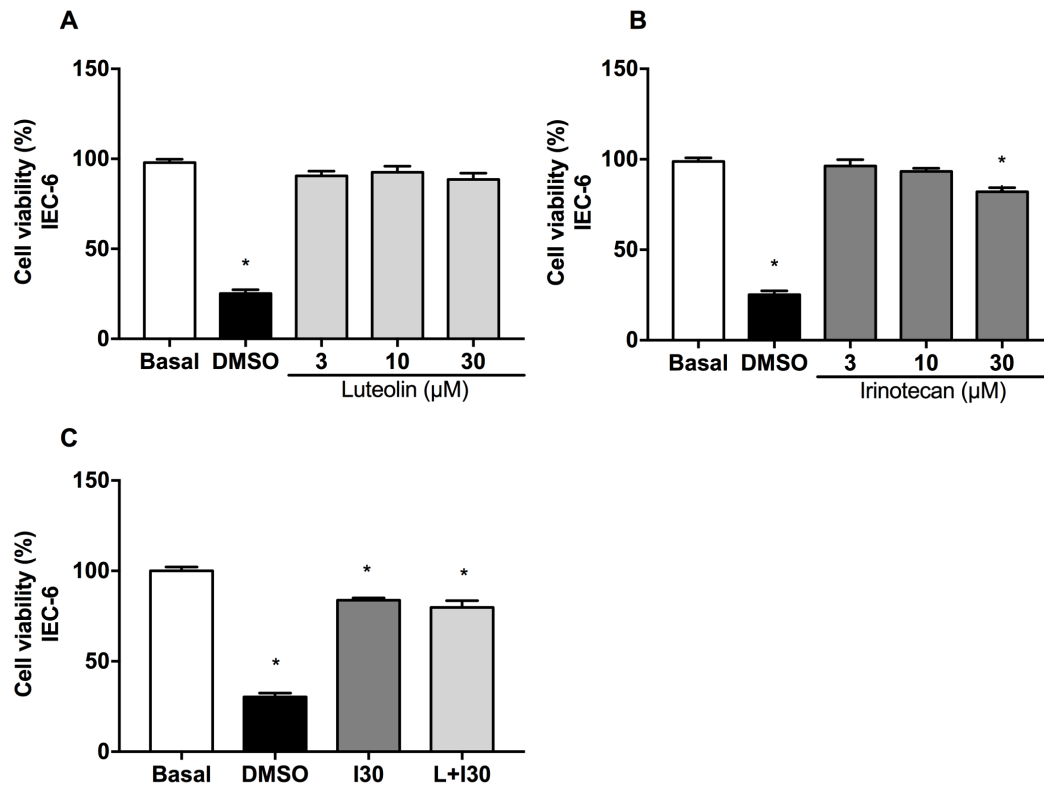

210

211 **Figure S6. Luteolin does not affect intestinal epithelial cell viability and does not**  
212 **alter the irinotecan-induced cytotoxicity.** Murine epithelial cells ( $5 \times 10^4$  cells/well)  
213 were seeded in 96-well plate and cell viability was measured using the MTT assay. Basal  
214 (DMEM plus DMSO 0.1%); DMSO (DMEM plus DMSO 10%); irinotecan (I: 3-30  $\mu$ M);  
215 luteolin (L: 3-30  $\mu$ M). The results are expressed as mean  $\pm$  SEM (n = 3 replicates).  
216 Statistical analysis was performed using one-way ANOVA followed by Bonferroni's post  
217 hoc test. \* p < 0.05 when compared to basal group.

218

219

220

221 **Figure S7**

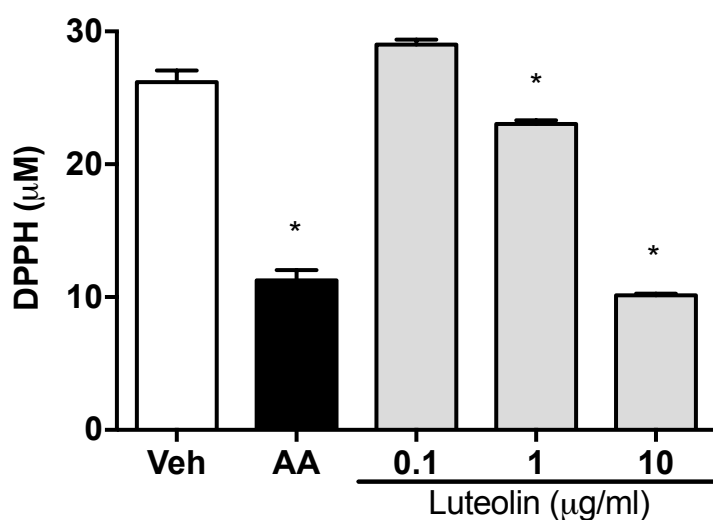

222

223 **Figure S7. Effect of Luteolin on *in vitro* ability to scavenge the free-radical DPPH.**

224 The results are expressed as mean  $\pm$  SEM. Statistical analysis was performed using one-

225 way analysis of variance (ANOVA) followed by Bonferroni test. IC50 of  $\sim$ 1.84  $\mu$ g/ml.

226 \*p < 0.05 compared to the vehicle group. Vehicle (Veh: water). Ascorbic acid (AA: 50

227  $\mu$ g/ml).

228

229

230

231

232

233

234

235

236

237 **Table S1. Effects of Luteolin on relative organ weights of irinotecan-exposed mice.**

238

239

240

241

242

243

244

245

246

247

| Organ weight<br>(g/10g body weight) | Groups        |                            |                            |               |
|-------------------------------------|---------------|----------------------------|----------------------------|---------------|
|                                     | Naive         | Veh + Iri                  | Lut 30 mg/kg + Iri         | Lut 30 mg/kg  |
| <i>Heart</i>                        | 0.038 ± 0.002 | 0.039 ± 0.002              | 0.043 ± 0.002              | 0.041 ± 0.004 |
| <i>Lung</i>                         | 0.067 ± 0.007 | 0.061 ± 0.003              | 0.069 ± 0.004              | 0.056 ± 0.004 |
| <i>Spleen</i>                       | 0.044 ± 0.003 | 0.020 ± 0.002 <sup>a</sup> | 0.054 ± 0.008 <sup>b</sup> | 0.041 ± 0.004 |
| <i>Liver</i>                        | 0.488 ± 0.022 | 0.385 ± 0.017 <sup>a</sup> | 0.510 ± 0.023 <sup>b</sup> | 0.391 ± 0.027 |
| <i>Right Kidney</i>                 | 0.065 ± 0.002 | 0.057 ± 0.003              | 0.067 ± 0.003              | 0.062 ± 0.002 |
| <i>Left Kidney</i>                  | 0.058 ± 0.001 | 0.062 ± 0.003              | 0.064 ± 0.003              | 0.058 ± 0.001 |

248 Female mice were treated for 14 days by oral route with vehicle (Veh: water plus Tween 1%, 10 ml/kg) or luteolin (30 mg/kg). Irinotecan was  
 249 given by intraperitoneal route (75 mg/kg, from 7<sup>th</sup> to 10<sup>th</sup> day) for Veh and Lut-treated groups (Veh + Iri and Lut + Iri). The results are expressed  
 250 as mean ± SEM (*n* = 6). Statistical analysis was performed using one-way ANOVA followed by Bonferroni's post hoc test. <sup>a</sup>*p* < 0.05 compared to  
 251 the naive. <sup>b</sup>*p* < 0.05 compared to Veh + Iri.

252

253 **Table S2. Effects of Luteolin on plasma biochemistry of irinotecan-exposed mice.**

254

255

| Test                      | Groups       |                           |                           |              |
|---------------------------|--------------|---------------------------|---------------------------|--------------|
|                           | Naive        | Veh + Iri                 | Lut 30 mg/kg + Iri        | Lut 30 mg/kg |
| <i>Urea (mg/dL)</i>       | 57.1 ± 5.9   | 45.8 ± 3.9                | 49.9 ± 5.0                | 43.1 ± 2.3   |
| <i>Creatinine (mg/dL)</i> | 0.12 ± 0.02  | 0.09 ± 0.01               | 0.11 ± 0.01               | 0.10 ± 0.01  |
| <i>AST (UI/L)</i>         | 165.1 ± 58.1 | 410.2 ± 35.8 <sup>a</sup> | 390.4 ± 28.1 <sup>a</sup> | 350.8 ± 49.8 |
| <i>ALT (UI/L)</i>         | 60.1 ± 10.4  | 119.4 ± 6.8 <sup>a</sup>  | 67.5 ± 12.6 <sup>b</sup>  | 51.6 ± 8.3   |

267

268 Female mice were treated for 14 days by oral route with vehicle (Veh: water plus Tween 1%, 10 ml/kg) or luteolin (30 mg/kg). Irinotecan was  
 269 given by intraperitoneal route (75 mg/kg, from 7<sup>th</sup> to 10<sup>th</sup> day) for Veh and Lut-treated groups (Veh + Iri and Lut + Iri). The results are expressed  
 270 as mean ± SEM (*n* = 6). Statistical analysis was performed using one-way ANOVA followed by Bonferroni test. <sup>a</sup>*p* < 0.05 compared to the naive.

271 <sup>b</sup>*p* < 0.05 compared to the Veh + Iri.



272 **Supporting References**

- 273 Boeing, T., Souza, P. de, Bonomini, T.J., Mariano, L.N.B., Somensi, L.B., Lucinda,  
274 R.M., et al. (2018). Antioxidant and anti-inflammatory effect of plumieride in dextran  
275 sulfate sodium-induced colitis in mice. *Biomed. Pharmacother.* 99: 697-703.
- 276 Brand-Williams, W., Cuvelier, M.E., and Berset, C. (1995). Use of a free radical  
277 method to evaluate antioxidant activity. *LWT - Food Sci. Technol.* 28: 25–30.
- 278 Cobos, E.J., Ghasemlou, N., Araldi, D., Segal, D., Duong, K., and Woolf, C.J. (2012).  
279 Inflammation-induced decrease in voluntary wheel running in mice: A nonreflexive test  
280 for evaluating inflammatory pain and analgesia. *Pain* 153: 876–884.
- 281 Ikuno, N., Soda, H., Watanabe, M., and Oka, M. (1995). Irinotecan (CPT-11) and  
282 Characteristic Mucosal Changes in the Mouse Ileum and Cecum. 87: 1876-83.
- 283 Quintão, N.L.M., Pastor, M.V.D., Antonialli, C. de-S., Silva, G.F. da, Rocha, L.W.,  
284 Berté, T.E., et al. (2019). Aleurites moluccanus and its main active constituent, the  
285 flavonoid 2''-O-rhamnosylswertisin, in experimental model of rheumatoid arthritis. *J.*  
286 *Ethnopharmacol.* 235: 248–254.
- 287
- 288
- 289
